# Supplementary material for: pH-Responsive self-assembly of cationic surfactants with a star-shaped tetra-carboxylate acid and the solubilization of hydrophobic drugs
Source: Royal Society of Chemistry journal article supplement (doi:10.1039/c7sm01940h), 2017-01-01
Supplement: c7sm01940h1.pdf [file c7sm01940h1.pdf]

## Electronic Supplementary Information

# pH-Responsive self-assembly of cationic surfactants with a star-shaped tetra-carboxylate acid and the solubilization of hydrophobic drugs

Ruilian Qi,<sup>ab</sup> Zhang Liu,<sup>a</sup> Chengcheng Zhou,<sup>ab</sup> Yuchun Han,<sup>\*a</sup> and Yilin Wang<sup>\*ab</sup>

<sup>a</sup> Key Laboratory of Colloid, Interface and Chemical Thermodynamics, Beijing National Laboratory for Molecular Sciences (BNLMS), CAS Research/Education Center for Excellence in Molecular Sciences, Institute of Chemistry, Chinese Academy of Sciences, Beijing 100190, P. R. China

<sup>b</sup> University of Chinese Academy of Sciences, Beijing 100049, P. R. China

### 1. Surface tension curve of 12-6-12 in the presence of 1.00 mM 4EOCOOH at pH 7.0

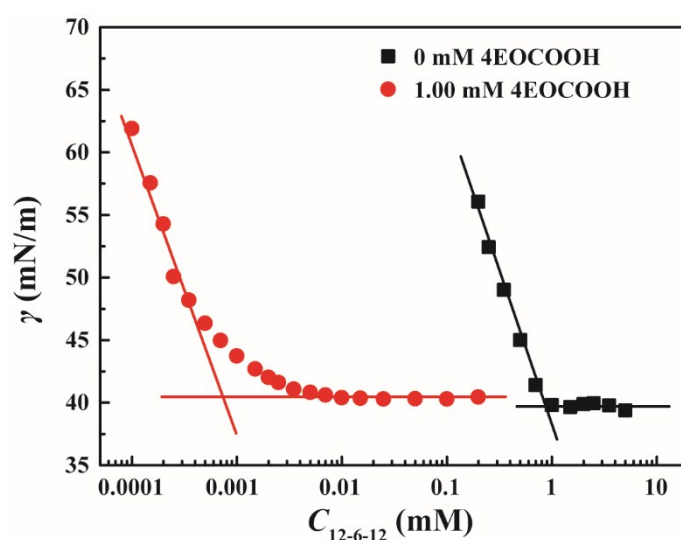

**Fig. S1** Surface tension curve of 12-6-12 in the presence of 1.00 mM 4EOCOOH (●) and absence of 4EOCOOH (■) at pH 7.0.

## 2. Surface tension curve of DTAB in the presence of 1.00 mM 4EOCOOH at pH 7.0

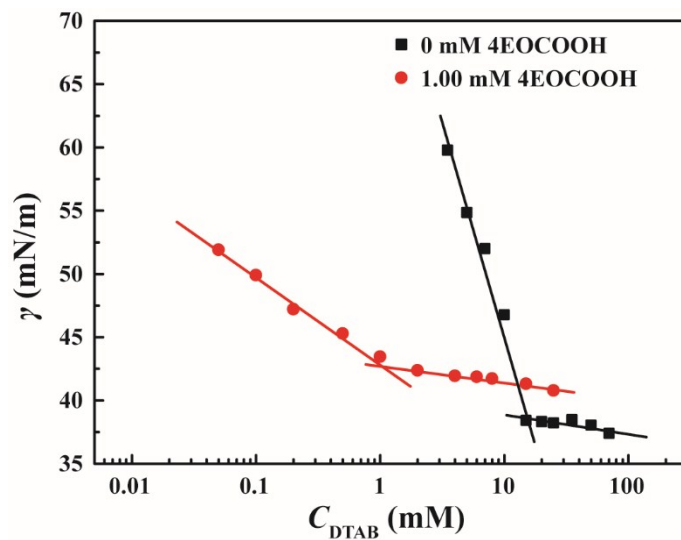

**Fig. S2** Surface tension curve of DTAB in the presence of 1.00 mM 4EOCOOH (●) and absence of 4EOCOOH (■) at pH 7.0.
